# Supplementary material for: Simple and Fast One-Pot Cellulose Gel Preparation in Aqueous Pyrrolidinium Hydroxide Solution–Cellulose Solvent and Antibacterial Agent
Source: MDPI journal article supplement (doi:10.3390/polym13121942), 2021-06-11
Supplement: s1 [file s1]

# Simple and Fast One-Pot Cellulose Gel Preparation in Aqueous Pyrrolidinium Hydroxide Solution–Cellulose Solvent and Antibacterial Agent

Elisabeth R. D. Seiler, Kohei Koyama, Tomoyuki Iijima, Tamao Saito, Yuko Takeoka, Masahiro Rikukawa and Masahiro Yoshizawa-Fujita \*

Department of Materials and Life Sciences, Sophia University, 7-1 Kioi-cho, Chiyoda-ku, Tokyo 102-8554, Japan; e-seiler@eagle.sophia.ac.jp (E.R.D.S.); kouheihunpty@icloud.com (K.K.); jima-tomo@eagle.sophia.ac.jp (T.I.); tasaito@sophia.ac.jp (T.S.); y-tabuch@sophia.ac.jp (Y.T.); m-rikuka@sophia.ac.jp (M.R.)

\* Correspondence: masahi-f@sophia.ac.jp

## 1. Cross-linking mechanism

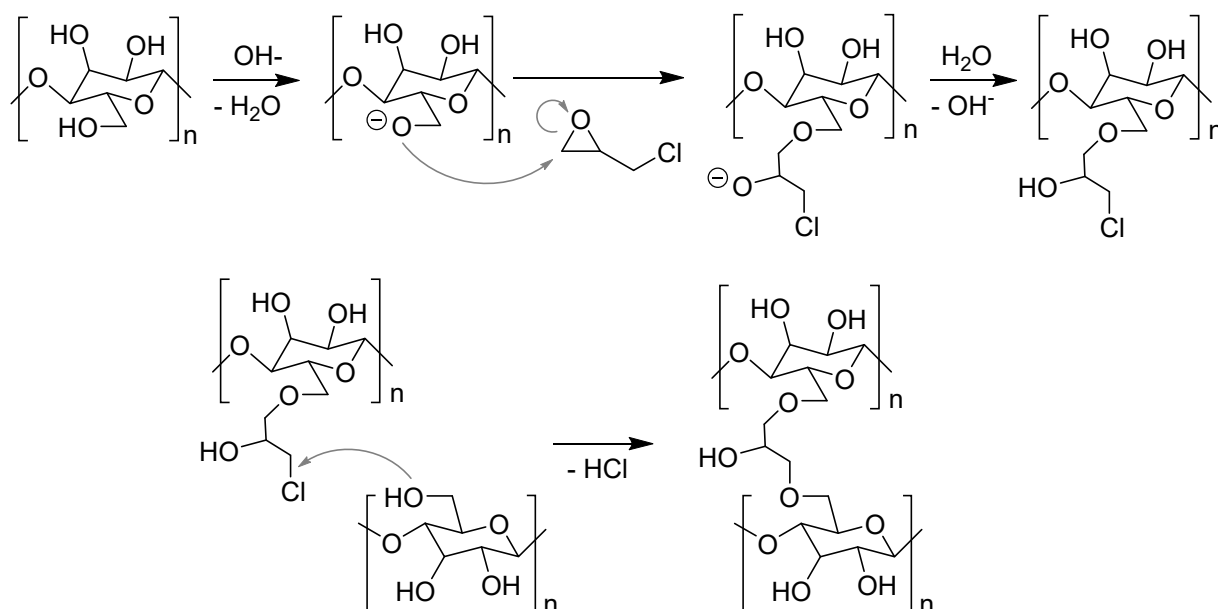

**Scheme S1.** Proposed crosslinking mechanism of cellulose with epichlorohydrin under alkaline condition.

## 2. Dissolution of cellulose

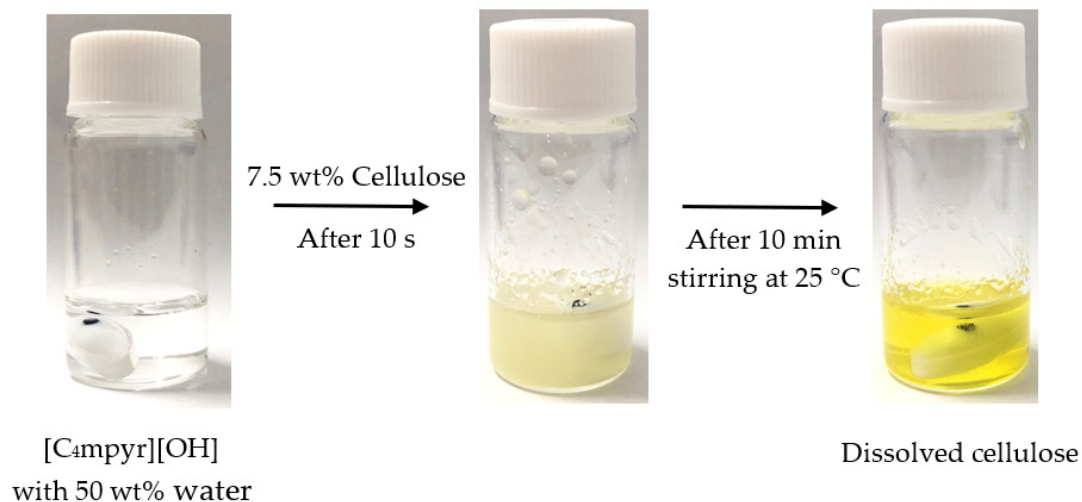

**Figure S1.** Dissolution example of cellulose in [C<sub>4</sub>mpyr][OH] aqueous solution.

## 3 <sup>1</sup>H-NMR of regenerated [C<sub>4</sub>mpyr][OH]

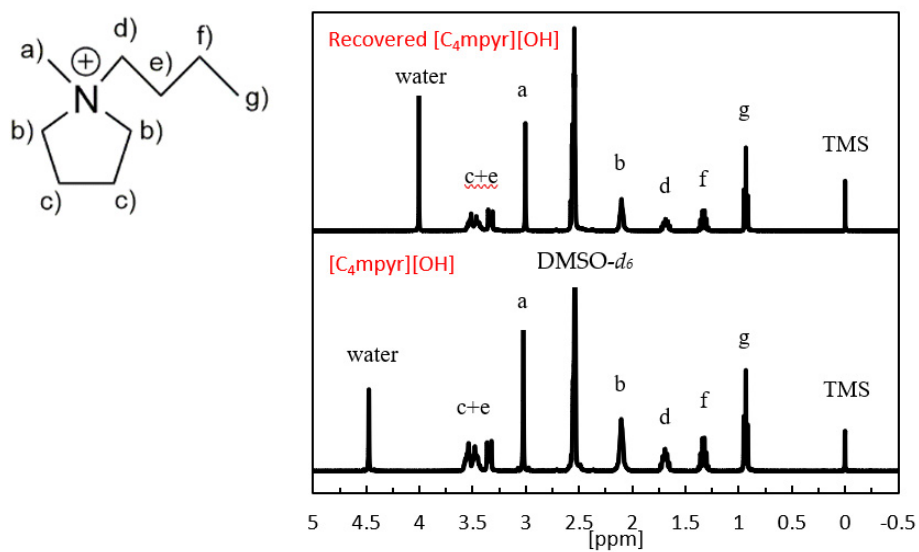

**Figure S2.** <sup>1</sup>H NMR of [C<sub>4</sub>mpyr][OH] after synthesis (bottom) and [C<sub>4</sub>mpyr][OH] recovered from gels (top).

#### 4. Compression test

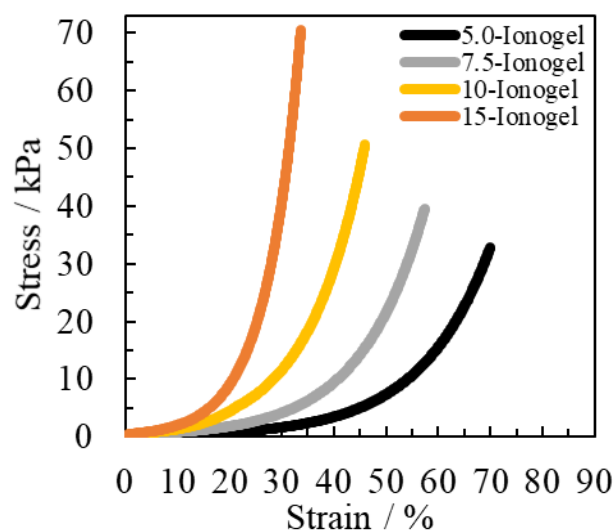

Figure S3. Stress-strain curves of ionogels with different cellulose concentration.

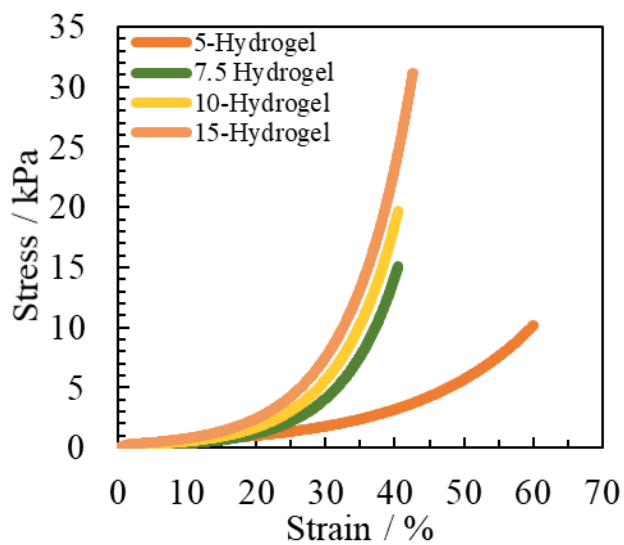

Figure S4. Stress-strain curves of hydrogels with different cellulose concentration swollen in 40 mL water for 24 h at 25 °C.

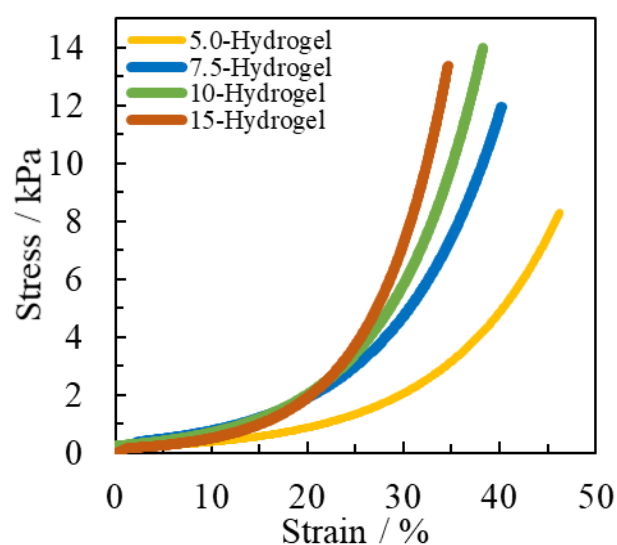

**Figure S5.** Stress-strain curves of hydrogels with different cellulose concentration swollen in 80 mL water for 24 h at 25 °C.

### 5. Antibacterial Test (Disc-diffusion Test against *B. subtilis* and *E. coli* B/r)

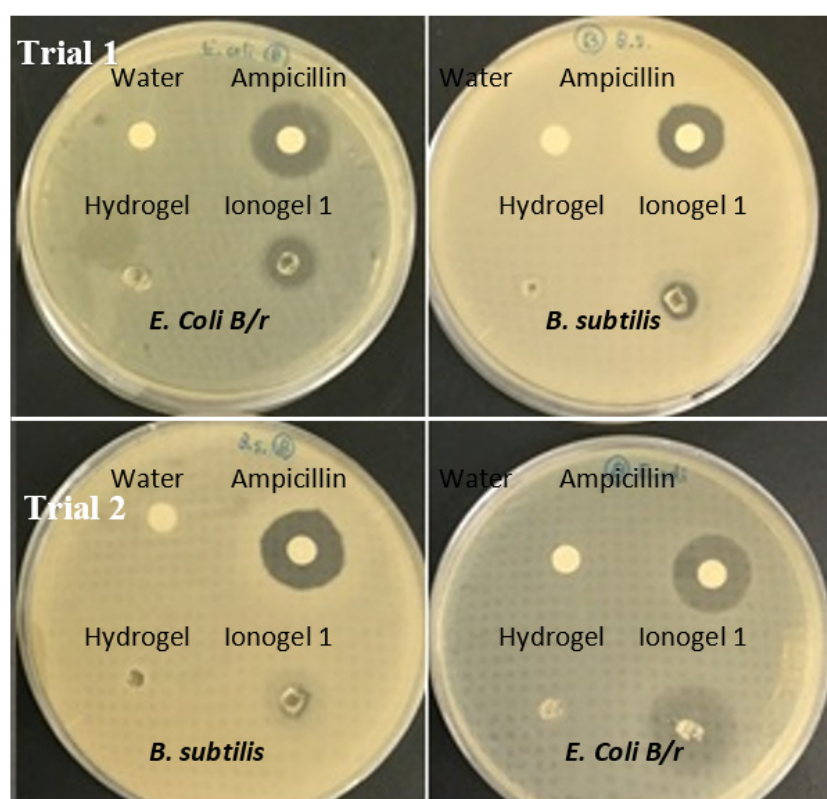

**Figure S6.** Disk-diffusion test of ionogels and hydrogels against *B. subtilis* and *E. coli* b/r. after incubation at 37 °C for 16 h. As positive control ampicillin and as negative control water was used.

**Table S1.** Inhibition zone of ionogels, hydrogel and Ampicillin against *B. subtilis* and *E. coli* B/r. after incubation at 37 °C for 16 h.

| Sample Name | Bacillus           | Cellulose / wt% | Crosslinker / eq. | Inhibition Zone / mm |         |         |
|-------------|--------------------|-----------------|-------------------|----------------------|---------|---------|
|             |                    |                 |                   | Trial 1              | Trial 2 | Average |
| Ampicillin  | <i>B. subtilis</i> | 0               | 0                 | 18                   | 14      | 16      |
| Ionogel 1   |                    | 5               | 10                | 10                   | 10      | 10      |
| Ionogel 2   |                    | 3.5             | 10                | 15                   | 14      | 14.5    |
| Ionogel 3   |                    | 5               | 3                 | 18                   | 18      | 18      |
| Hydrogel    |                    | 5               | 3                 | 0                    | 0       | 0       |
| Ampicillin  | <i>E. coli</i> B/r | 0               | 0                 | 14                   | 18      | 16      |
| Ionogel 1   |                    | 5               | 10                | 22                   | 26      | 24      |
| Ionogel 2   |                    | 3.5             | 10                | 26                   | 28      | 27      |
| Ionogel 3   |                    | 5               | 3                 | 28                   | 30      | 29      |
| Hydrogel    |                    | 5               | 3                 | 0                    | 0       | 0       |
